# Supplementary material for: Deciphering the largest disease-associated transcript isoforms in the human neural retina with advanced long-read sequencing approaches
Source: HighWire-hosted journal article supplement (doi:10.1101/gr.280060.124), 2025-03-04
Supplement: Supplemental_Table_S3.xlsx [file Supplemental_Table_S3.xlsx]

## Sheet: Blad1
Table S3: Overview of genomic positions for sporadic inclusions of cryptic exons in USH2A (GRCh38).
gene located on	Gene	cryptic exon	intron where cryptic exon is located (reference ENST00000307340.8)	Chromosome	splice acceptor GRCh38	splice donor GRCh38
strand -	USH2A	cryptic exon 3A	3	Chr1	g.216389969	g.216389931
strand -	USH2A	cryptic exon 4A	4	Chr1	g.216362934	g.216362661
strand -	USH2A	cryptic exon 5A	5	Chr1	g.216326490	g.216326342
strand -	USH2A	cryptic exon 8A (PE8 Reurink et al., 2023)	8	Chr1	g.216322599	g.216322481
strand -	USH2A	cryptic exon 9A	9	Chr1	g.216308060	g.216307919
strand -	USH2A	cryptic exon 9B	9	Chr1	g.216294939	g.216294692
strand -	USH2A	cryptic exon 9C	9	Chr1	g.216293802	g.216293721
strand -	USH2A	cryptic exon 11A	11	Chr1	g.216286548	g.216286363
strand -	USH2A	cryptic exon 11B	11	Chr1	g.216280134	g.216279992
strand -	USH2A	cryptic exon 11C	11	Chr1	g.216252971	g.216252869
strand -	USH2A	cryptic exon 12A	12	Chr1	g.216247918	g.216247777
strand -	USH2A	cryptic exon 13A	13	Chr1	g.216244273	g.216244153
strand -	USH2A	cryptic exon 13B	13	Chr1	g.216242185	g.216242063
strand -	USH2A	cryptic exon 13C	13	Chr1	g.216237513	g.216237477
strand -	USH2A	cryptic exon 14A	14	Chr1	g.216228002	g.216227838
strand -	USH2A	cryptic exon 15A	15	Chr1	g.216212078	g.216212049
strand -	USH2A	cryptic exon 16A	16	Chr1	g.216205455	g.216205287
strand -	USH2A	cryptic exon 20A	20	Chr1	g.216183353	g.216183086
strand -	USH2A	cryptic exon 20B	20	Chr1	g.216182996	g.216182704
strand -	USH2A	cryptic exon 20C (PE30 Reurink et al., 2023)	20	Chr1	g.216179463	g.216179377
strand -	USH2A	cryptic exon 20D	20	Chr1	g.216179479	g.216179377
strand -	USH2A	cryptic exon 22A	22	Chr1	g.216094101	g.216094015
strand -	USH2A	cryptic exon 32A	32	Chr1	g.216022989	g.216022778
strand -	USH2A	cryptic exon 32B	32	Chr1	g.216002398	g.216002253
strand -	USH2A	cryptic exon 35A	35	Chr1	g.215978894	g.215978845
strand -	USH2A	cryptic exon 37A	37	Chr1	g.215964112	g.215963847
strand -	USH2A	cryptic exon 41A	41	Chr1	g.215882377	g.215882308
strand -	USH2A	cryptic exon 43A	43	Chr1	g.215868299	g.215868135
strand -	USH2A	cryptic exon 44A	44	Chr1	g.215862302	g.215862237
strand -	USH2A	cryptic exon 44B	44	Chr1	g.215860236	g.215860089
strand -	USH2A	cryptic exon 45A	45	Chr1	g.215845515	g.215845438
strand -	USH2A	cryptic exon 49A	49	Chr1	g.215802230	g.215802162
strand -	USH2A	cryptic exon 50A	50	Chr1	g.215792698	g.215792627
strand -	USH2A	cryptic exon 58A	58	Chr1	g.215748594	g.215748495
strand -	USH2A	cryptic exon 61A	61	Chr1	g.215723716	g.215723574
strand -	USH2A	cryptic exon 64A	64	Chr1	g.215662472	g.215662349
strand -	USH2A	cryptic exon 64B	64	Chr1	g.215658686	g.215658590
strand -	USH2A	cryptic exon 65A	65	Chr1	g.215650476	g.215650402
strand -	USH2A	cryptic exon 67A	67	Chr1	g.215641613	g.215641522
strand -	USH2A	cryptic exon 70A	70	Chr1	g.215633076	g.215633022
strand -	USH2A	cryptic exon 71A	71	Chr1	g.215628107	g.215627988
